# Supplementary material
Source: PubMed Central journal article supplement (PMC3124562)

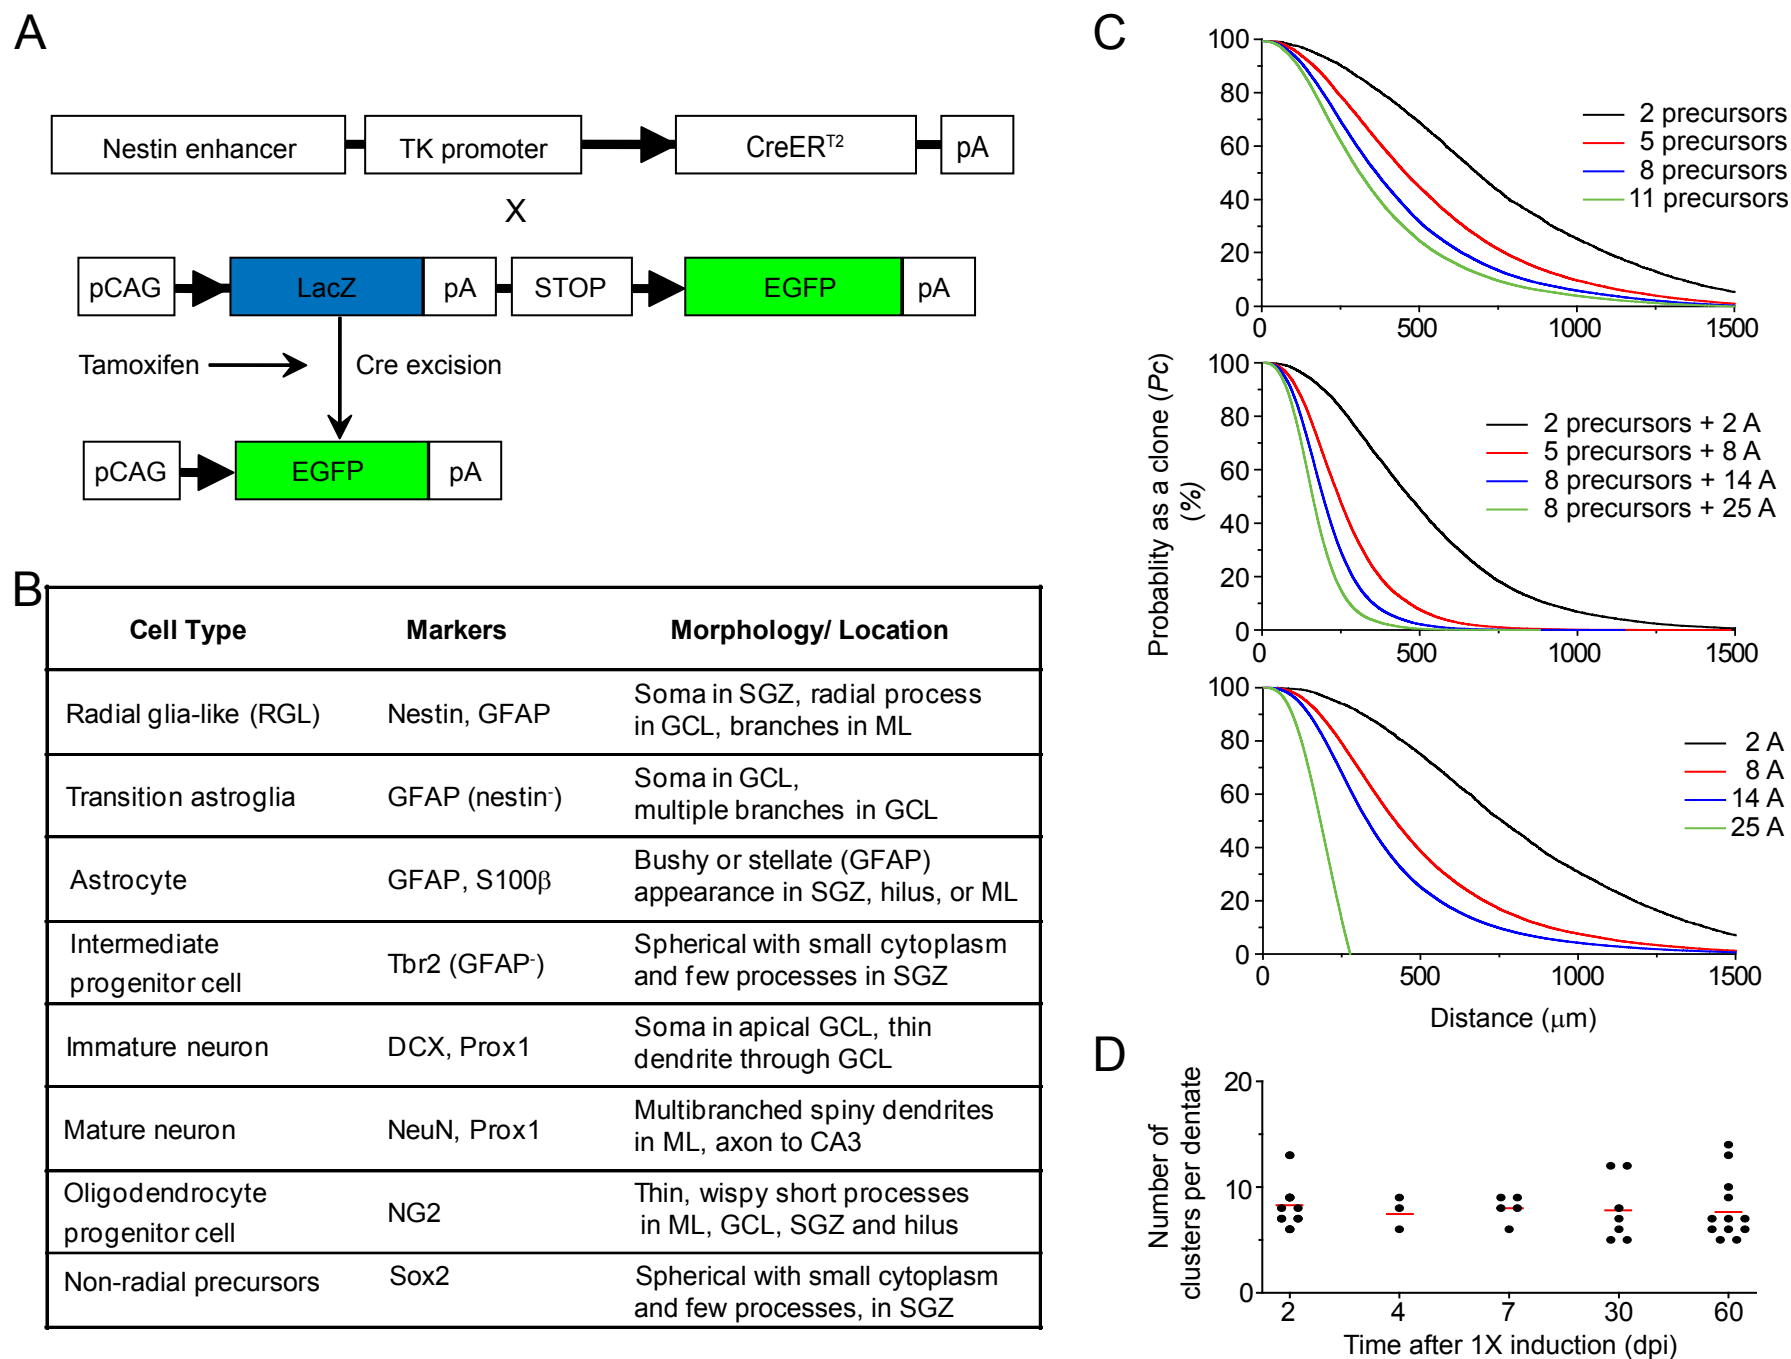

A

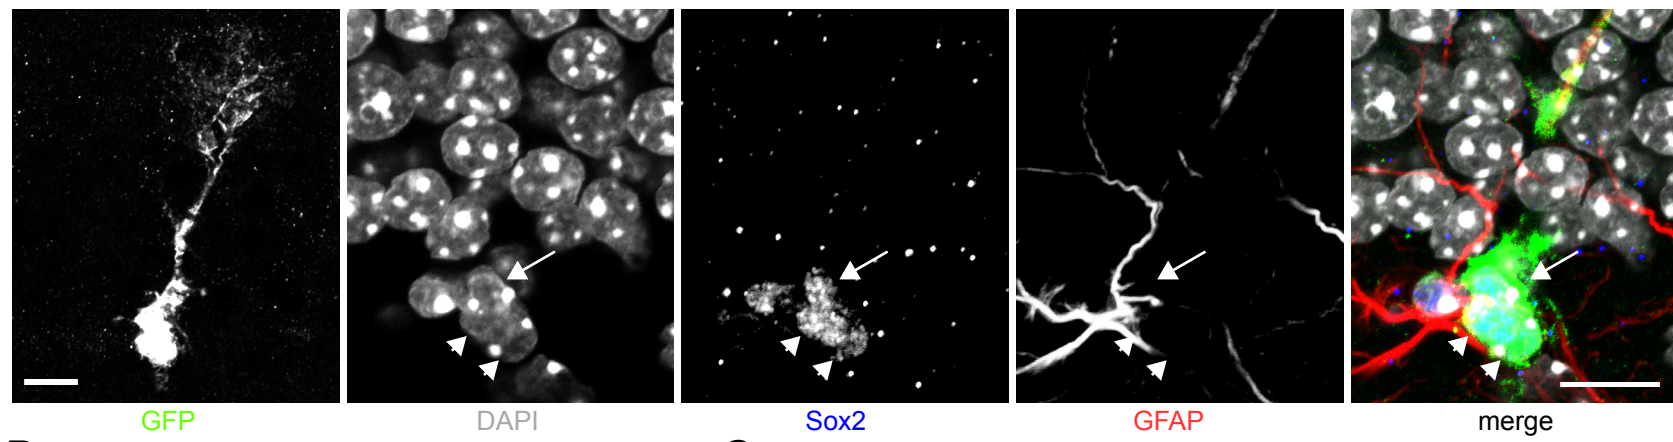

B

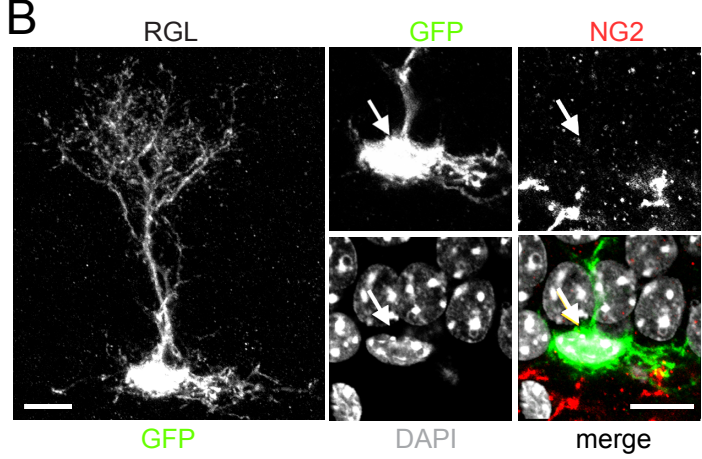

C

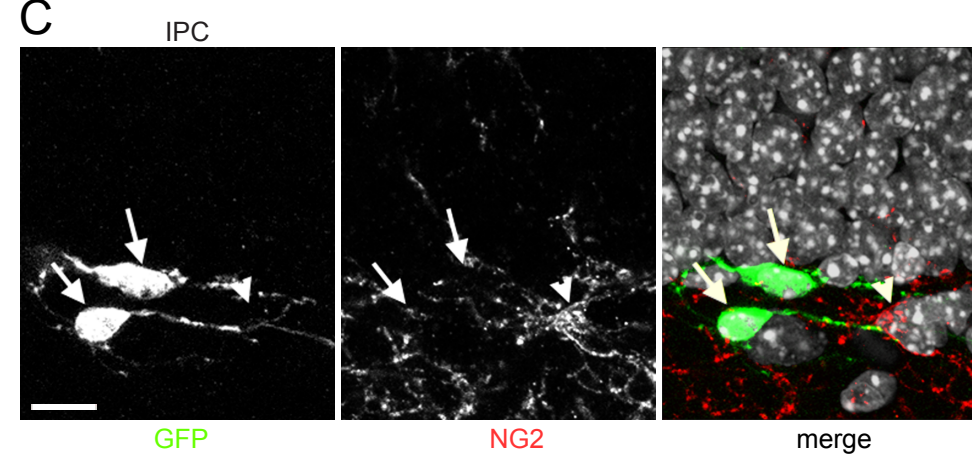

D

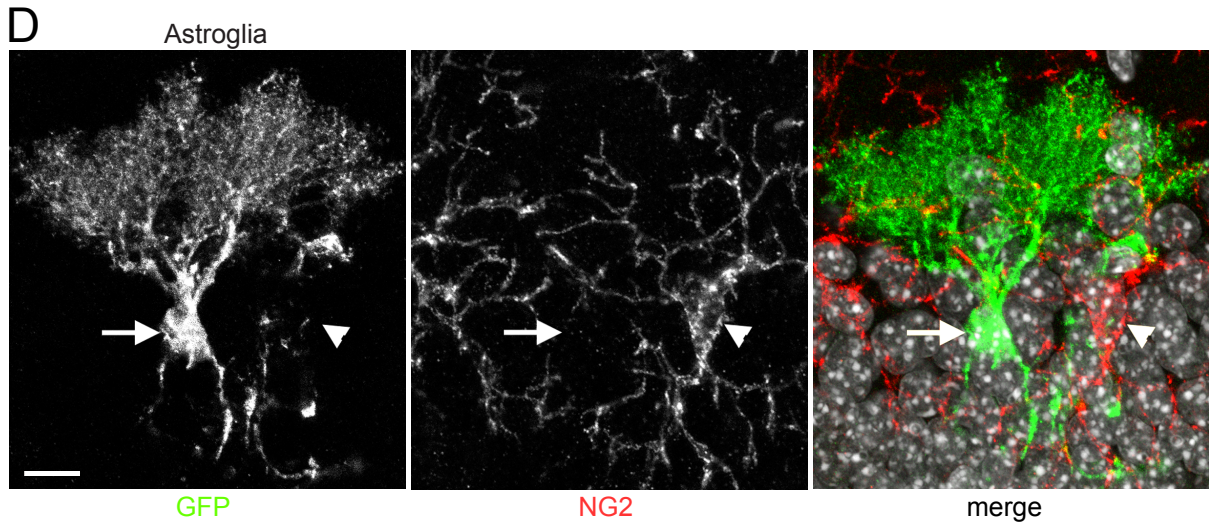

E

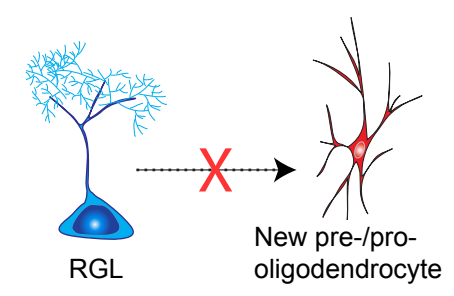

A

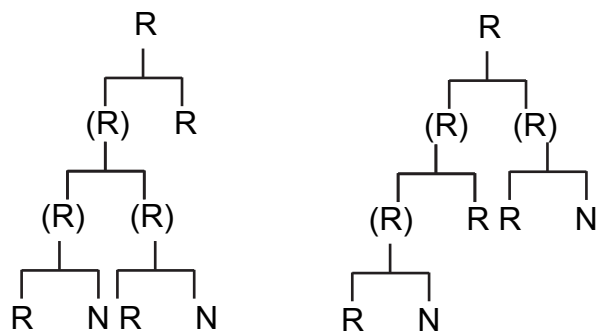

B

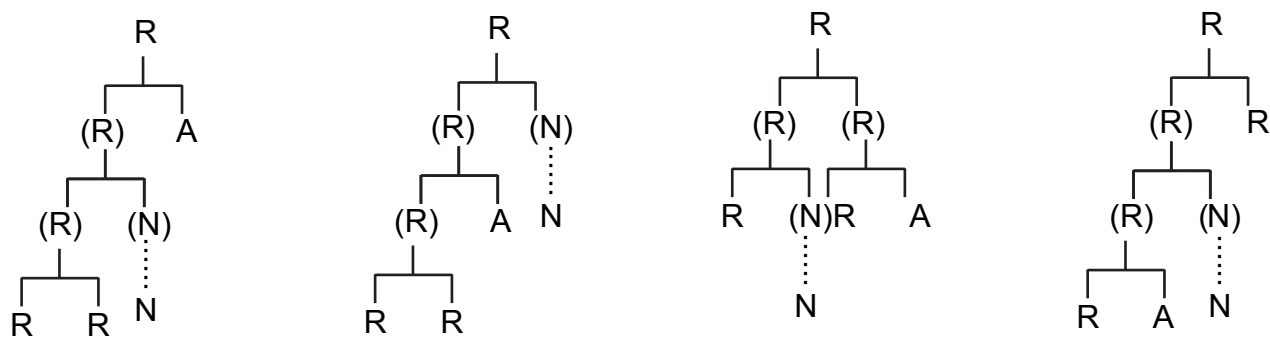

A

| Clone classification    | Cell number per clone (1 mpi) |   |   |   |   |   |    |    |    |
|-------------------------|-------------------------------|---|---|---|---|---|----|----|----|
|                         | 1                             | 2 | 3 | 4 | 5 | 6 | 14 | 17 | 20 |
| Quiescent (single R)    | 14                            |   |   |   |   |   |    |    |    |
| Expansion (R + R)       |                               | 2 |   |   |   |   |    |    |    |
| Unipotent (R + A)       |                               | 6 | 4 |   | 1 |   |    |    |    |
| Unipotent (R + N)       |                               | 6 | 3 |   | 2 | 2 |    | 1  |    |
| Multipotent (R + A + N) |                               |   |   |   | 2 |   | 1  |    | 1  |
| Differentiated (no R)   | 1                             | 3 | 4 |   | 1 |   |    |    |    |

B

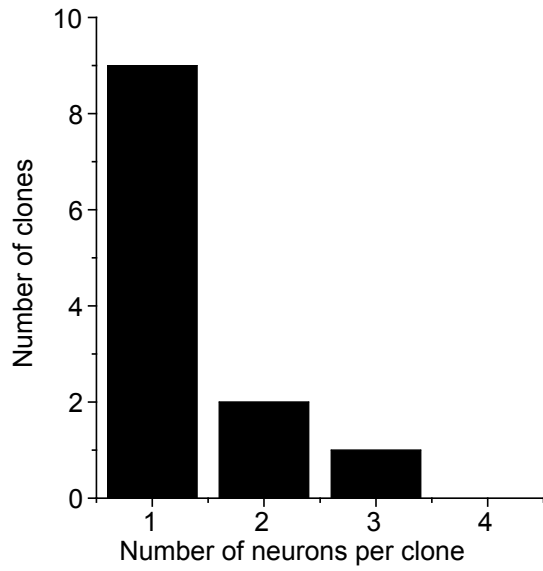

C

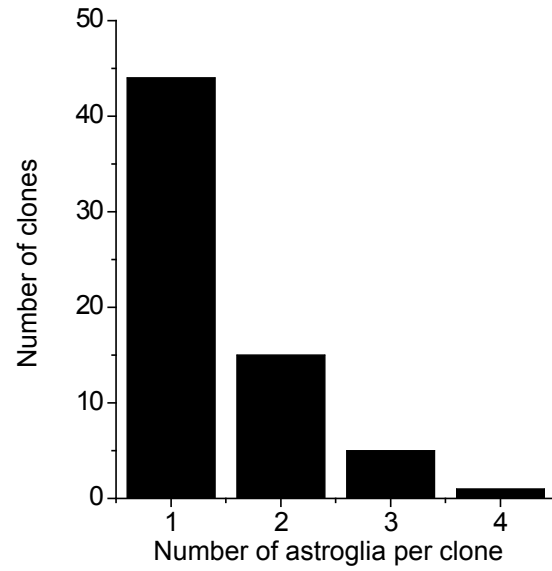

D

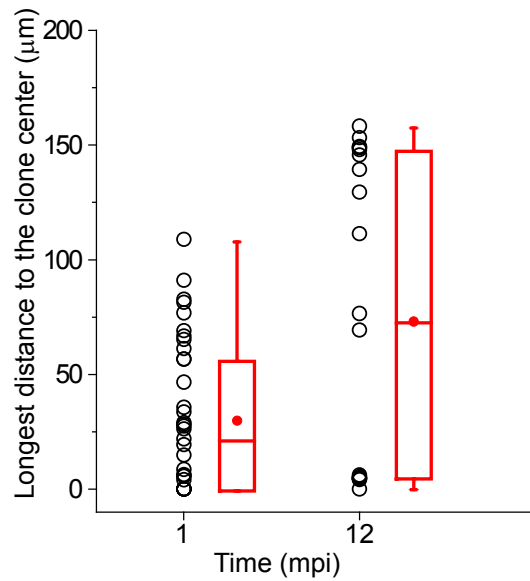

E

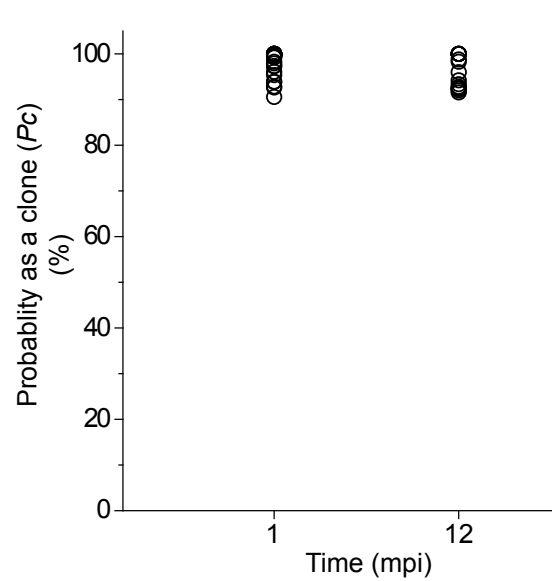



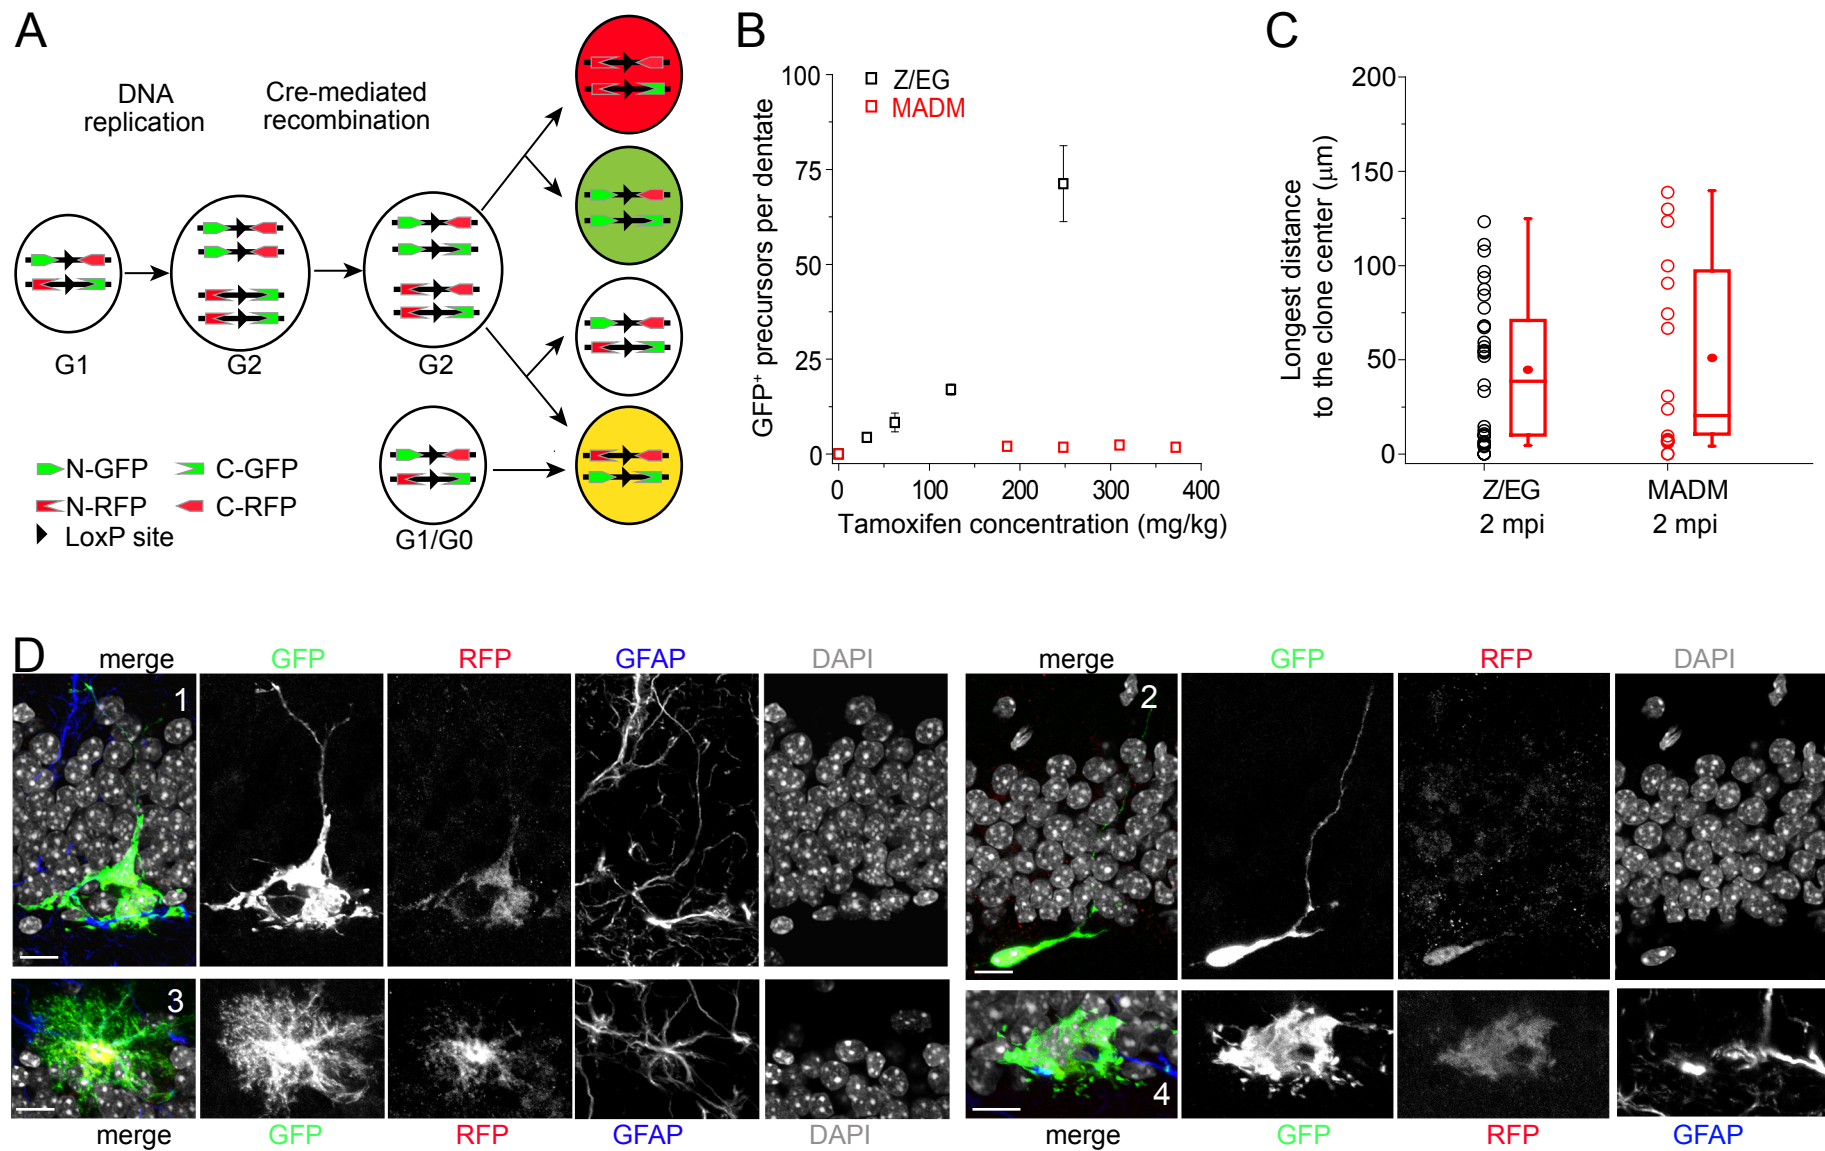

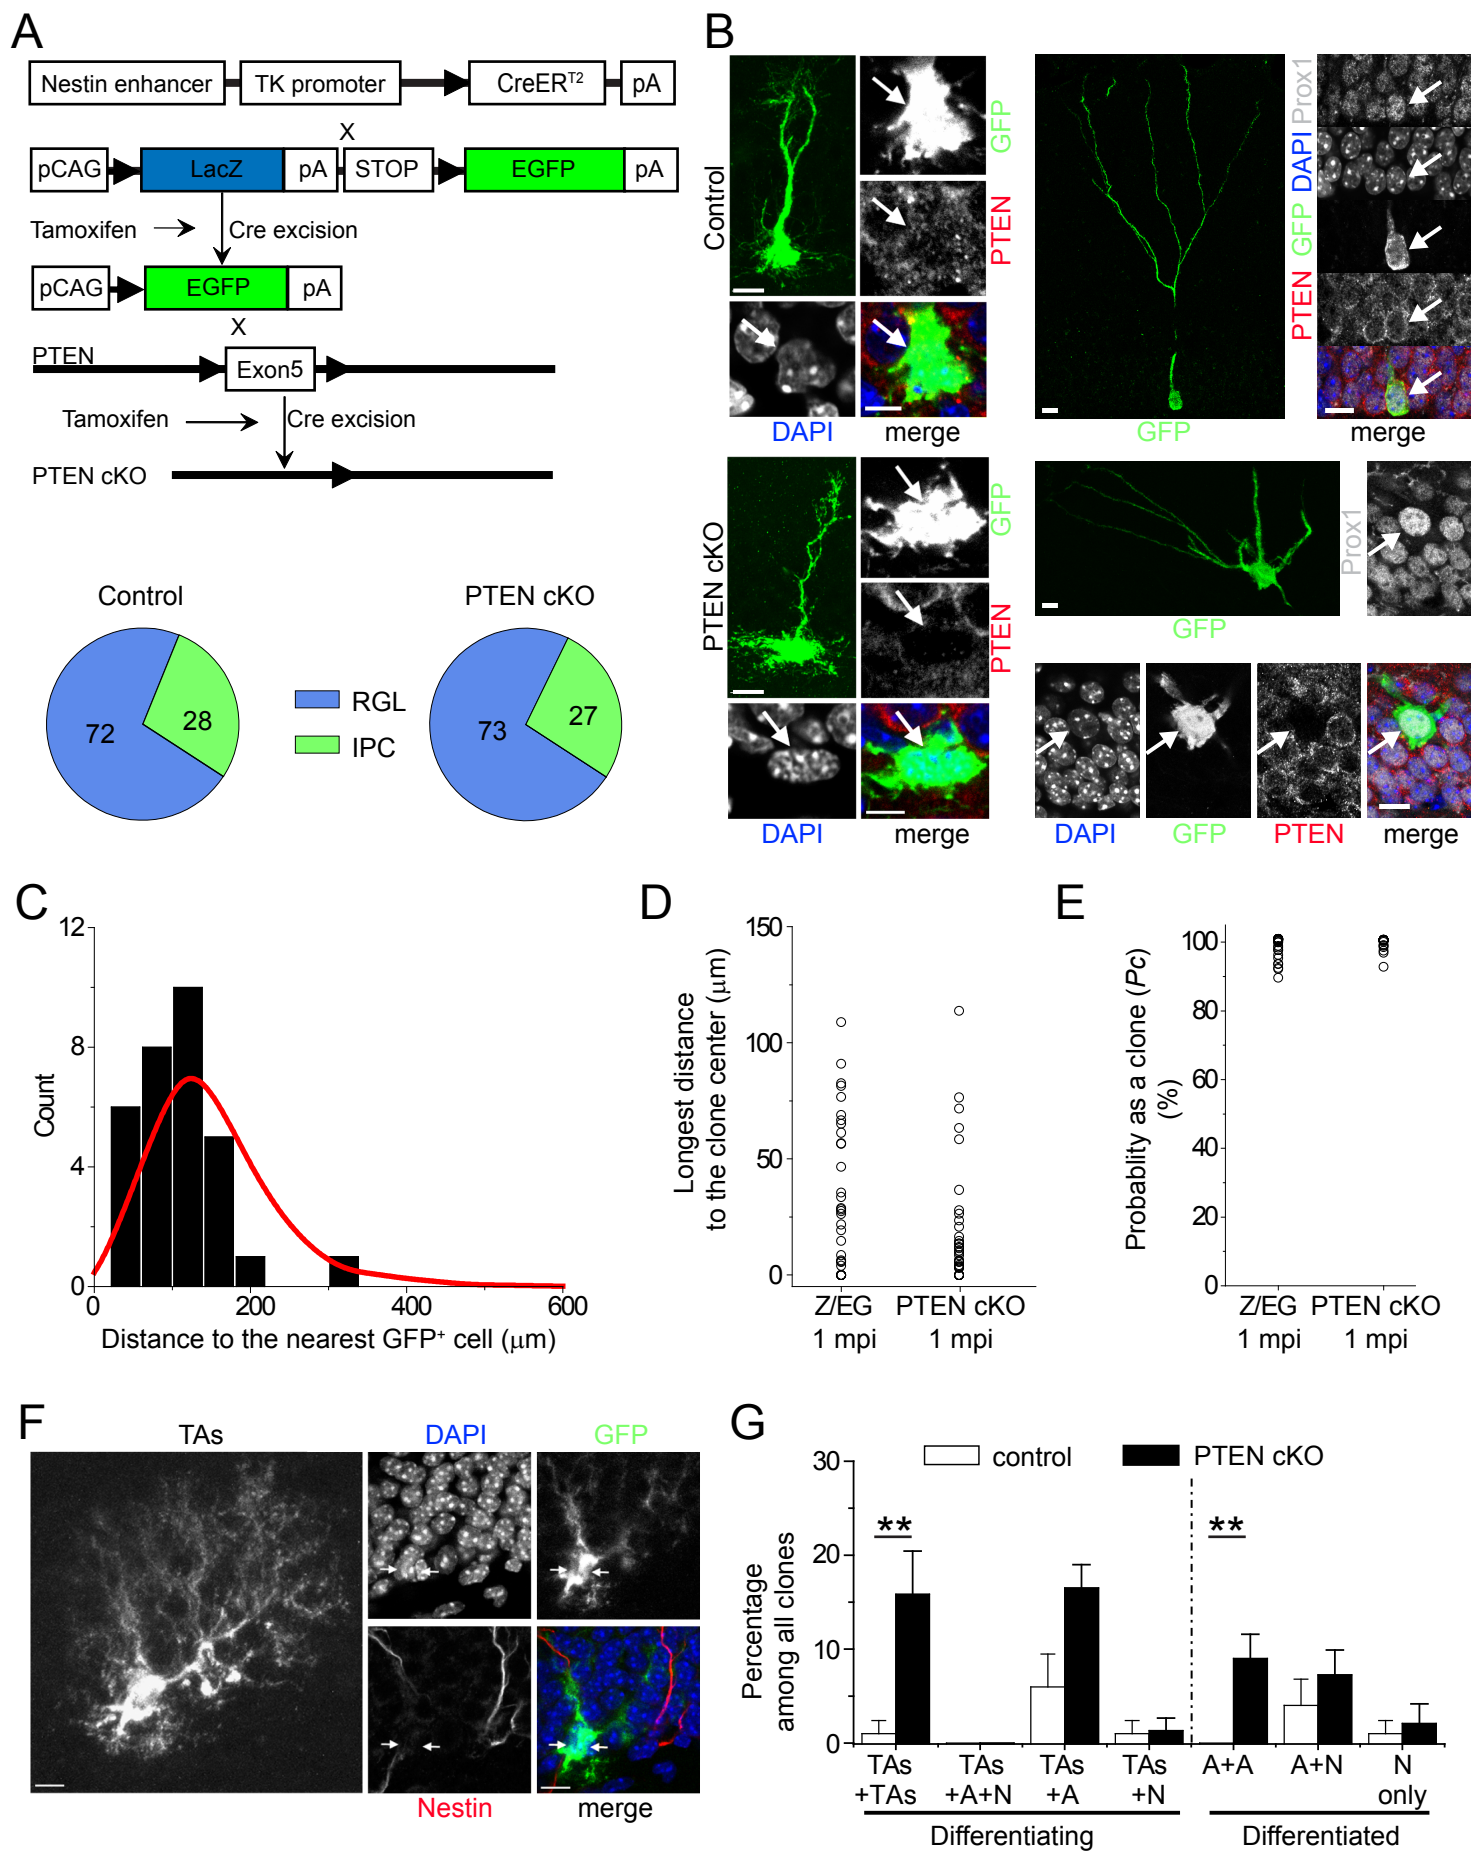

Supplement: NIHMS300786-supplement-02.pdf [file NIHMS300786-supplement-02.pdf]
